# Supplementary material for: An Efficient Plant Regeneration and Transformation System of Ma Bamboo (Dendrocalamus latiflorus Munro) Started from Young Shoot as Explant
Source: PubMed Central journal article supplement (PMC5529393; doi:10.3389/fpls.2017.01298), 2017-07-27

# Supplemental Figure 1

**A**

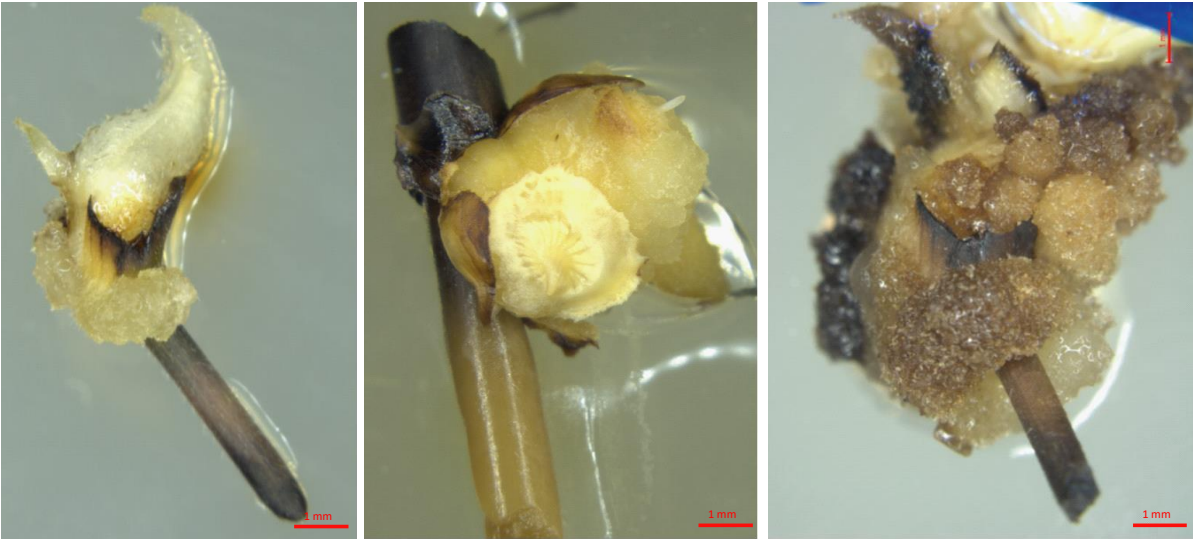

**B**

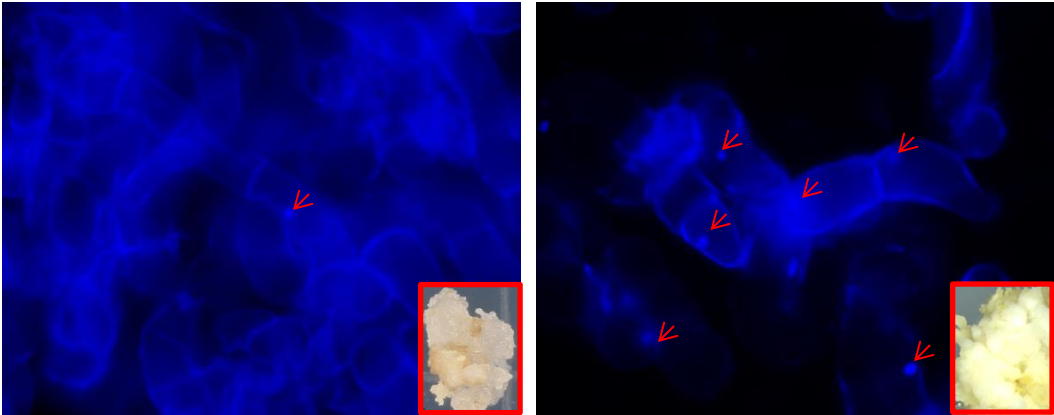

## Supplemental Figure 2

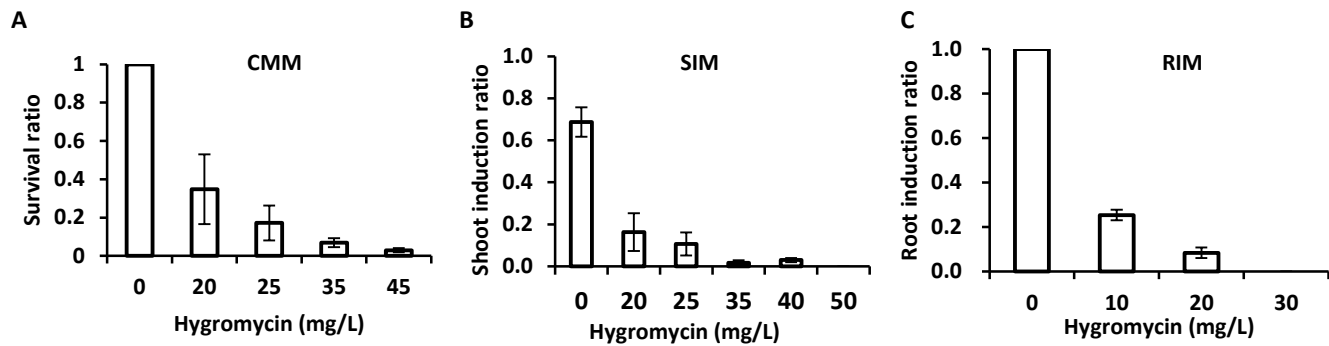

Supplement: Presentation_1.pdf [file Presentation_1.pdf]
